# Supplementary material for: Tuber flours improve intestinal health and modulate gut microbiota composition
Source: PubMed Central journal article supplement — Food Chem X. 2021 Oct 26;12:100145. doi: 10.1016/j.fochx.2021.100145 (PMC8571703; doi:10.1016/j.fochx.2021.100145), 2021-10-26
Supplement: mmc1.pdf [file mmc1.pdf]

**Manuscript Title**

Tuber flours improve intestinal health and modulate gut microbiota composition

**Author list**

Tao Xu, Weisu Huang, Jiajia Liang, Yongheng Zhong, Qi Chen, Fan Jie, Baiyi Lu\*

**Table S1. Diets formula<sup>a</sup>**

|                          | diet (g/kg dry weight) |                        |                       |                       |                      |
|--------------------------|------------------------|------------------------|-----------------------|-----------------------|----------------------|
|                          | AIN-93M                | Cassava starch<br>diet | Cassava flour<br>diet | Potato starch<br>diet | Potato flour<br>diet |
| corn starch              | 465.692                | 0.000                  | 0.000                 | 0.000                 | 0.000                |
| cassava starch           | 0.000                  | 465.692                | 0.000                 | 0.000                 | 0.000                |
| cassava flour            | 0.000                  | 0.000                  | 465.692               | 0.000                 | 0.000                |
| potato starch            | 0.000                  | 0.000                  | 0.000                 | 465.692               | 0.000                |
| potato flour             | 0.000                  | 0.000                  | 0.000                 | 0.000                 | 465.692              |
| casein                   | 140.000                | 140.000                | 140.000               | 140.000               | 140.000              |
| dextrin                  | 155.000                | 155.000                | 155.000               | 155.000               | 155.000              |
| sucrose                  | 100.000                | 100.000                | 100.000               | 100.000               | 100.000              |
| soybean oil              | 40.000                 | 40.000                 | 40.000                | 40.000                | 40.000               |
| cellulose                | 50.000                 | 50.000                 | 50.000                | 50.000                | 50.000               |
| mineral mix (AIN-93M-MX) | 35.000                 | 35.000                 | 35.000                | 35.000                | 35.000               |
| vitamins mix (AIN-93-VX) | 10.000                 | 10.000                 | 10.000                | 10.000                | 10.000               |
| L-cysteine               | 1.800                  | 1.800                  | 1.800                 | 1.800                 | 1.800                |
| Choline bitartrate       | 2.500                  | 2.500                  | 2.500                 | 2.500                 | 2.500                |
| TBHQ                     | 0.008                  | 0.008                  | 0.008                 | 0.008                 | 0.008                |

<sup>a</sup>Values in the same row do not share the same lowercase letter are significantly different ( $P < 0.05$ )

**Table S2. Nutritional composition of diets<sup>a</sup>**

| Nutritional composition (%) | Cassava starch<br>diet | Cassava flour<br>diet | Potato starch<br>diet | Potato flour<br>diet |
|-----------------------------|------------------------|-----------------------|-----------------------|----------------------|
| Dry matter                  | 92.73±0.04             | 93.33±0.03            | 93.85±0.11            | 92.15±0.07           |
| Carbohydrate                | 73.15±3.17             | 71.93±2.76            | 74.83±3.58            | 69.05±4.49           |
| Crude protein               | 12.42±0.01 b           | 13.04±0.06 b          | 12.61±0.01 b          | 15.58±0.80 a         |
| Crude fat                   | 4.63±0.02 a            | 4.83±0.03 a           | 3.79±0.02 b           | 3.83±0.01 b          |
| Crude ash                   | 2.52±0.02 b            | 3.53±0.03 a           | 2.62±0.04 b           | 3.69±0.04 a          |
| Crude fiber                 | 0.10±0.01              | 0.12±0.01             | 0.10±0.02             | 0.13±0.01            |
| Rapidly digestible starch   | 36.20±2.11 b           | 31.50±0.25 c          | 38.20±1.94 a          | 26.57±0.18 d         |
| Slowly digestible starch    | 7.19±0.11 b            | 11.67±2.21 a          | 8.76±1.47 b           | 10.15±0.99 a         |
| Resistant starch            | 2.20±0.40 b            | 3.52±0.73 a           | 1.28±0.48 c           | 2.04±0.26 b          |
| kJ/g feed                   |                        |                       |                       |                      |
| Energy density              | 10.51                  | 11.58                 | 11.95                 | 12.47                |

<sup>a</sup>Values in the same row do not share the same lowercase letter are significantly different ( $P < 0.05$ )

**Table S3. Fasting blood glucose level and blood lipids profile of rats fed with different diets after 7 weeks**

|                      | FBG(mmol/L) | TG(mmol/L) | TC(mmol/L) | HDL-C(mmol/L) | LDL-C(mmol/L) |
|----------------------|-------------|------------|------------|---------------|---------------|
| Cassava starch group | 3.99±0.42   | 1.44±0.17  | 2.41±0.35  | 0.64±0.09     | 0.32±0.01     |
| Cassava flour group  | 4.47±0.86   | 1.28±0.32  | 2.07±0.58  | 0.51±0.10     | 0.33±0.02     |
| Potato starch group  | 3.97±0.84   | 0.95±0.04  | 1.84±0.28  | 0.54±0.09     | 0.33±0.02     |
| Potato flour group   | 3.79±0.53   | 1.24±0.50  | 2.26±0.40  | 0.64±0.10     | 0.32±0.02     |

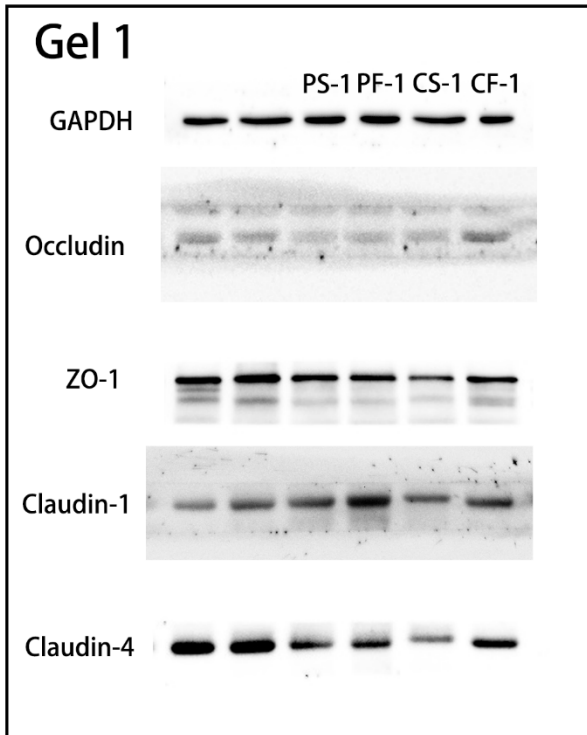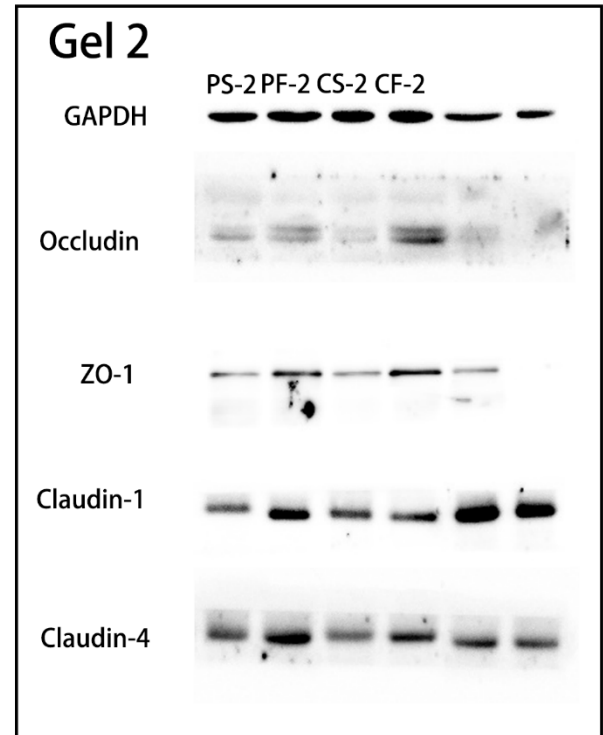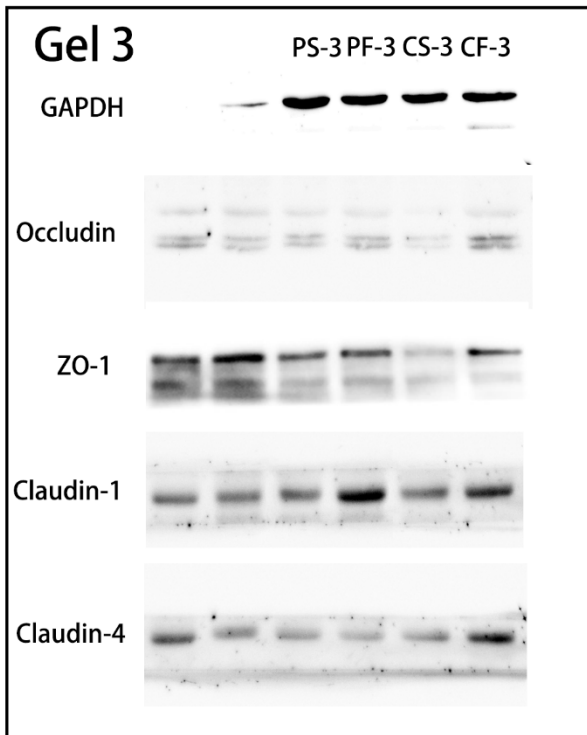

**Figure S1. Original image of three gels of western blot analysis.**

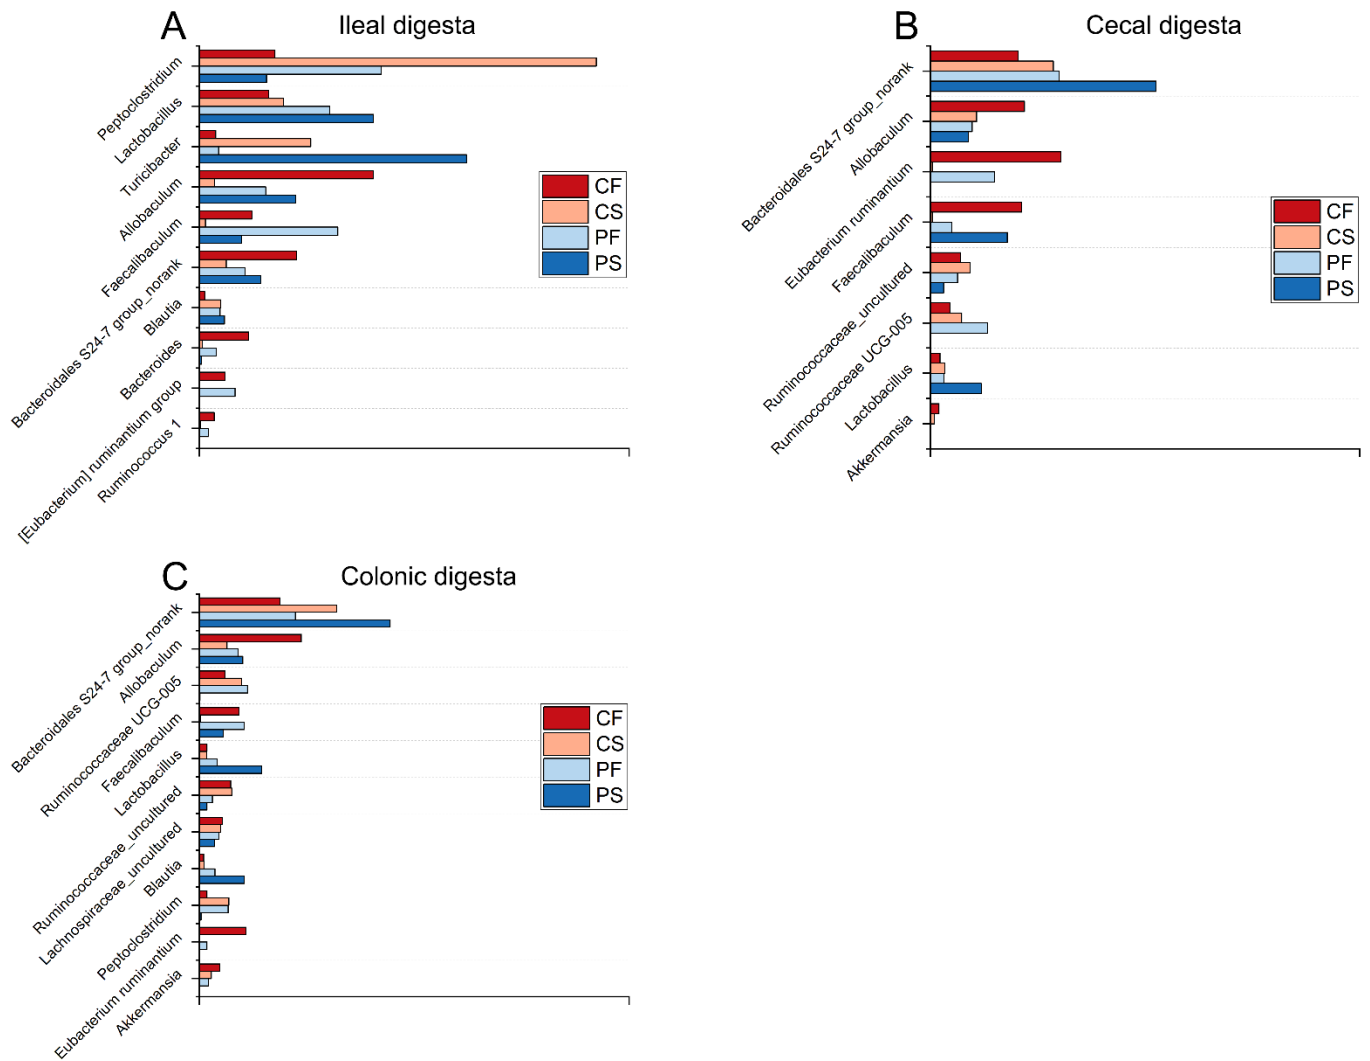

**Figure S2. Relative abundance of gut microbiota at genus level.** Bar graph of relative abundance in ileum (A), cecum (B), and colon (C).

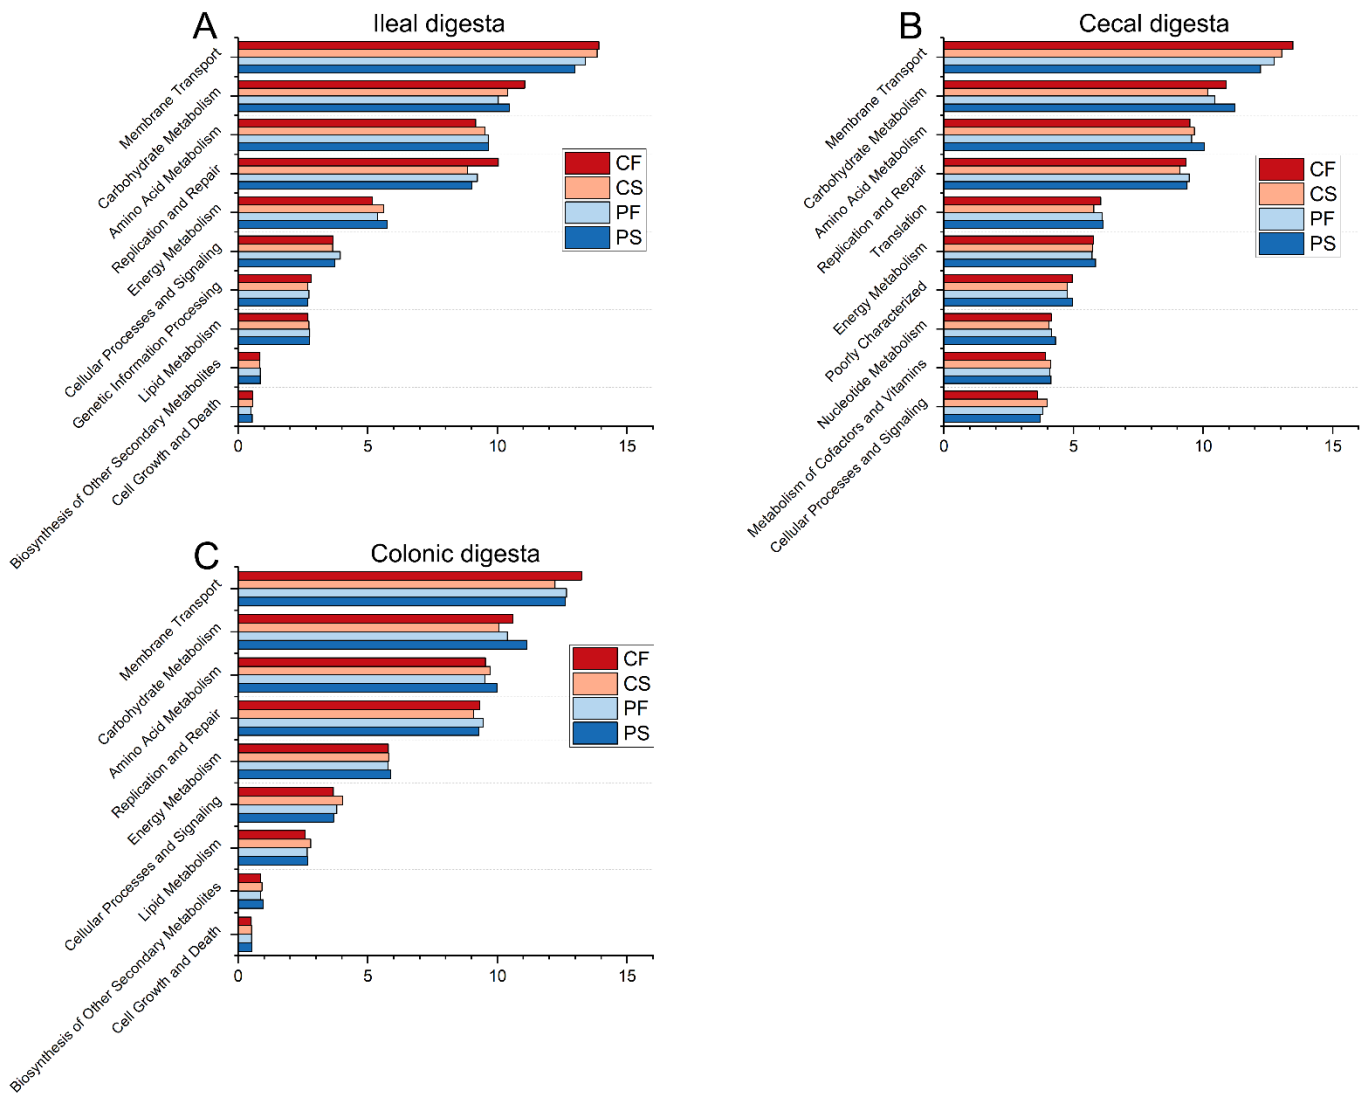

**Figure S3. PICRUSt analysis of different diet on gut microbiota.** The different gene function predicted for gut microbiota in ileum (A), cecum (B), and colon (C).
